# Supplementary material for: Assessing histone demethylase inhibitors in cells: lessons learned
Source: Epigenetics Chromatin. 2017 Mar 1;10:9. doi: 10.1186/s13072-017-0116-6 (PMC5333395; doi:10.1186/s13072-017-0116-6)
Supplement: Supplementary file 2 — Additional file 2: Table S1. KDMs and mutant KDMs for which assays are reported including histone mark assessed. [file 13072_2017_116_MOESM2_ESM.xlsx]

## Sheet: Table S1
Overexpressed KDM	Histone mark assessed in IF assay	Mutant
KDM3A	H3K9me2	H1120Y
KDM4A	H3K9me3	H188A/E190A
KDM4B	H3K9me3	H189A/E191A
KDM4C	H3K9me3	H190A/E192A
KDM5A	H3K4me3	H483A/E485A
KDM5B	H3K4me3	H499A/E501A
KDM5C	H3K4me3	H513A/E515A
KDM5D	H3K4me3	H510A/E512A
KDM6B	H3K27me3	H1390A/E1392A
