# Supplementary material for: Assessing histone demethylase inhibitors in cells: lessons learned
Source: Epigenetics Chromatin. 2017 Mar 1;10:9. doi: 10.1186/s13072-017-0116-6 (PMC5333395; doi:10.1186/s13072-017-0116-6)
Supplement: Supplementary file 4 — Additional file 4: Table S2. Cell permeability data of compounds tested. [file 13072_2017_116_MOESM4_ESM.xlsx]

## Sheet: Table S2
Compound	Caco-2 (A to B flux) (x10-6 cm/s)
KDOAM-20	<0.76
KDOAM-21	5.32
KDIPP15	20.7
KDIPP51	6.86
CPI-455	5.21
