# Supplementary material for: Assessing histone demethylase inhibitors in cells: lessons learned
Source: Epigenetics Chromatin. 2017 Mar 1;10:9. doi: 10.1186/s13072-017-0116-6 (PMC5333395; doi:10.1186/s13072-017-0116-6)
Supplement: Supplementary file 7 — Additional file 7: Table S3. Effect of Doxorubicin, Paclitaxel and Staurosporine on KDM activity measured in in vitro KDM assay. [file 13072_2017_116_MOESM7_ESM.xlsx]

## Sheet: Table S3
Compound	KDM4C IC50 (µM)	KDM6B IC50 (µM)	KDM5B IC50 (µM)
Paclitaxel	>100	>100	>100
Staurosporine	>100	>100	>100
Doxorubicin	6.2*	6.4*	10.6*
*Likely false positive due to colour quenching due to its bright red colour.
