# Supplementary material for: Assessing histone demethylase inhibitors in cells: lessons learned
Source: Epigenetics Chromatin. 2017 Mar 1;10:9. doi: 10.1186/s13072-017-0116-6 (PMC5333395; doi:10.1186/s13072-017-0116-6)
Supplement: Supplementary file 10 — Additional file 10. Methods and chemical synthesis. [file 13072_2017_116_MOESM10_ESM.docx]

Supplementary Methods

**Chemistry:** Commercially available starting materials, reagents and anhydrous solvents were used as supplied. Flash column chromatography was performed using Merck silica gel 60 (0.025 – 0.04 mm). Thin layer chromatography was performed using Merck Millipore TLC silica gel 60 F254 aluminium sheets and visualised by UV (254 & 280 nm), iodine and KMnO4. Column chromatography was also performed on a FlashMaster personal unit using isolute Flash silica columns or a Biotage Isolera purification system using Biotage KP-SNAP cartridges. Ion exchange chromatography was performed using acidic Isolute Flash SCX-II cartridges. 1H NMR spectra were recorded using either a Bruker Avance-500 or Bruker Avance-400 NMR machine. Samples were prepared as solutions in a deuterated solvent and referenced to the appropriate internal non-deuterated solvent peak or tetramethylsilane. Chemical shifts were recorded in ppm (δ) downfield of tetramethylsilane.

**LC/MS and HRMS analysis:** Analysis was performed on a Waters Acquity UPLC and diode array detector coupled to a Waters G2 QToF mass spectrometer fitted with a multimode ESI/APCI source. Method A: Analytical separation was carried out at 30 °C on a Phenomenex Kinetex C18 column (30 x 2.1 mm, 2.6u, 100A) using a flow rate of 0.5 mL/min in a 2 minute gradient elution with detection at 254 nm. The mobile phase was a mixture of methanol (solvent A) and water (solvent B), both containing formic acid at 0.1%. Gradient elution was as follows: 10:90 (A/B) to 90:10 (A/B) over 1.25 min, 90:10 (A/B) for 0.5 min, and then reversion back to 10:90 (A/B) over 0.15 min, finally 10:90 (A/B) for 0.1 min. Method B: Analytical separation was carried out at 30°C using a Phenomenex Kinetex C18 column (30 x 2.1 mm, 2.6u, 100A) using a flow rate of 0.3 mL/min in a 4 minute gradient elution with detection at 254 nm. The mobile phase was a mixture of methanol (solvent A) and water (solvent B), both containing formic acid at 0.1%. Gradient elution was as follows: 10:90 (A/B) to 90:10 (A/B) over 3 min, 90:10 (A/B) for 0.5 min, and then reversion back to 10:90 (A/B) over 0.3 min, finally 10:90 (A/B) for 0.2 min.

LC-HRMS method B referenced to Leucine Enkephalin fragment ion [M+H]+ 397.1876.

**8-Bromo-3-((2-(trimethylsilyl)ethoxy)methyl)quinazolin-4(3*H*)-one (1)**

8-Bromoquinazolin-4(3*H*)-one (304 mg, 1.35 mmol) was dissolved in anhydrous DMF (4 mL, 0.33 M). The solution was heated to 60 °C, and potassium carbonate (747 mg, 5.40 mmol) was added. After 5 min of stirring, (2-(chloromethoxy)ethyl)trimethylsilane (0.75 mL, 4.24 mmol) was slowly added and the reaction mixture stirred at 60 °C for 15 h. After cooling to room temperature the reaction mixture was diluted with EtOAc (20 mL) and washed with saturated NaHCO3 solution (20 mL). The aqueous layer was extracted twice more with EtOAc (2 × 20 mL) and the combined organic layers were washed with saturated LiCl solution (40 mL), saturated brine solution (40 mL), dried over MgSO4 and concentrated *in vacuo* to give the crude product which was purified by Biotage column chromatography on KP silica (20% EtOAc in cyclohexane) yielding product **1** as a white solid (314 mg, 65%). 1H NMR (500 MHz, CDCl3) 0.01 (s, 9H), 0.96-1.00 (m, 2H), 3.66-3.71 (m, 2H), 5.46 (s, 2H), 7.40 (t, *J* = 7.9 Hz, 1H), 8.07 (dd, *J* = 7.9, 1.4 Hz, 1H), 8.29 (s, 1H), 8.31 (dd, *J* = 7.9, 1.4 Hz, 1H); LCMS (Method A; ESI, *m/z*) *tr* = 1.52 min – 297, 299 [(M−SEM+TMS+H)+, Br isotope splitting pattern]. HRMS (Method B): found 297.0067; calculated for C11H14BrN2OSi (M−SEM+TMS+H)+ 297.0059.

**8-(4-(2-((*tert*-Butyldimethylsilyl)oxy)ethyl)-1*H*-pyrazol-1-yl)-3-((2-(trimethylsilyl)ethoxy)methyl)quinazolin-4(3*H*)-one (2)**

Bromide **1** (75 mg, 0.21 mmol), (1S,2S)-*N*1,*N*2-dimethylcyclohexane-1,2-diamine (5 mg, 0.04 mmol), copper(I) iodide (2 mg, 8.8 µmol) and anhydrous toluene (0.2 mL, 0.9 M) were added to a sealed tube containing 4-(2-((*tert*-butyldimethylsilyl)oxy)ethyl)-1*H*-pyrazole[[1]](#footnote-1) (40 mg, 0.18 mmol) and potassium carbonate (51 mg, 0.37 mmol) under N2. The reaction mixture was stirred at 110 °C for 15h. After cooling the reaction mixture was dry-loaded onto silica for purification by Biotage column chromatography (10% EtOAc in cyclohexane) yielding the product as a clear, colourless oil (43 mg, 0.09 mmol, 48%). 1H NMR (500 MHz, CDCl3) 0.01 (s, 9H), 0.07 (s, 6H), 0.92 (s, 9H), 0.96-1.01 (m, 2H), 2.81 (t, *J* = 6.6 Hz, 2H), 3.68-3.73 (m, 2H), 3.85 (t, *J* = 6.6 Hz, 2H), 5.47 (s, 2H), 7.60 (t, *J* = 7.9 Hz, 1H), 7.66 (s, 1H), 8.19 (s, 1H), 8.25 (dd, *J* = 7.9, 1.6 Hz, 1H), 8.28 (dd, *J* = 7.9, 1.6 Hz, 1H), 8.43 (s, 1H); LCMS (Method A; ESI, *m/z*) *tr* = 1.88 min – 501 [(M+H)+]; HRMS (Method B): found 501.2714; calculated for C25H41N4O3Si2 (M+H)+ 501.2717.

**8-(4-(2-Hydroxyethyl)-1*H*-pyrazol-1-yl)-3-((2-(trimethylsilyl)ethoxy)methyl)quinazolin-4(3*H*)-one (3)**

Hydrochloric acid (4 mL, 1 M) was added to a solution of TBS-protected alcohol **2** (180 mg, 0.36 mmol) in MeOH (4 mL, 0.1 M) at 0 °C. The reaction was stirred at 0 °C for 10 min, then diluted with EtOAc (15 mL), washed with saturated NaHCO3 solution (15 mL) and saturated brine solution (15 mL), dried over MgSO4, and concentrated *in vacuo* to give the product as a white solid (112 mg, 0.29 mmol, 81%). 1H NMR (500 MHz, CDCl3) 0.01 (s, 9H), 0.95-1.00 (m, 2H), 2.85 (t, *J* = 6.4 Hz, 2H), 3.67-3.72 (m, 2H), 3.87 (t, *J* = 6.4 Hz, 2H), 5.45 (s, 2H), 7.60 (t, *J* = 7.9 Hz, 1H), 7.67 (s, 1H), 8.18 (s, 1H), 8.23 (dd, *J* = 7.9, 1.5 Hz, 1H), 8.29 (dd, *J* = 7.9, 1.5 Hz, 1H), 8.43 (s, 1H), OH signal not observed; LCMS (Method B; ESI, *m/z*) *tr* = 2.94 min – 387 [(M+H)+].

**2-(1-(4-Oxo-3-((2-(trimethylsilyl)ethoxy)methyl)-3,4-dihydroquinazolin-8-yl)-1*H*-pyrazol-4-yl)ethyl methanesulfonate (4)**

Methanesulfonic anhydride (45 mg, 0.26 mmol) was added in one portion to a solution of alcohol **3** (66 mg, 0.17 mmol) and triethylamine (0.1 mL, 0.72 mmol) in anhydrous CH2Cl2 (2.5 mL, 0.07 M) at 0 °C under N2. The reaction mixture was stirred for 15 min at 0 °C and monitored by LCMS. When the reaction was complete, the reaction mixture was quenched with saturated NaHCO3 (10 mL) solution and extracted with CH2Cl2 (3 × 10 mL). The combined organic layers were washed with saturated brine solution (30 mL), dried over MgSO4, and concentrated *in vacuo* to give mesylate **4** as a pale-yellow oil. This was used in the next step without further purification.

**8-(4-(2-(4-(3-Chlorophenyl)piperidin-1-yl)ethyl)-1*H*-pyrazol-1-yl)-3-((2-(trimethylsilyl)ethoxy)methyl)quinazolin-4(3*H*)-one (5)**

Triethylamine (0.03 mL, 0.22 mmol) was added to a solution of mesylate **4** (50 mg, 0.11 mmol, freshly made from alcohol **3**) and 4-(3-chlorophenyl)piperidine (32 mg, 0.16 mmol) in anhydrous DMF (1 mL, 0.1 M) under N2. The reaction mixture was heated at 50 °C for 15 h and monitored by LCMS. When the reaction had gone to completion, the reaction mixture was diluted in H2O (5 mL) and extracted three times with EtOAc (3 × 5 mL). The combined organic layers were washed with saturated LiCl solution (10 mL) and saturated brine solution (10 mL), dried over MgSO4, and concentrated *in vacuo* to give the crude material which was purified by Biotage column chromatography on KP silica (5% [0.2 M NH3 in MeOH] in CH2Cl2) yielding product **5** as a pale yellow oil (51 mg, 0.09 mmol, 84%). 1H NMR (500 MHz, CDCl3) 0.01 (s, 9H), 0.96-1.00 (m, 2H), 1.78-1.91 (m, 4H), 2.17 (td, *J* = 11.7, 2.5 Hz, 2H), 2.53 (tt, *J* = 11.7, 4.2 Hz, 1H), 2.67-2.74 (m, 2H), 2.80-2.88 (m, 2H), 3.17 (br d, *J* = 11.7 Hz, 2H), 3.67-3.73 (m, 2H), 5.46 (s, 2H), 7.12-7.15 (m, 1H), 7.17-7.20 (m, 1H), 7.22-7.26 (m, 2H), 7.60 (t, *J* = 7.9 Hz, 1H), 7.67 (s, 1H), 8.20 (s, 1H), 8.25 (dd, *J* = 7.9, 1.5 Hz, 1H), 8.29 (dd, *J* = 7.9, 1.5 Hz, 1H), 8.42 (s, 1H); LCMS (Method A; ESI, *m/z*) *tr* = 1.27 min – 564, 566 [(M+H)+, Cl isotope splitting pattern]; HRMS (Method B): found 564.2576; calculated for C30H39ClN5O2Si (M+H)+ 564.2562.

**8-(4-(2-(4-(3-Chlorophenyl)piperidin-1-yl)ethyl)-1*H*-pyrazol-1-yl)quinazolin-4(3*H*)-one (CCT366293)**

Hydrochloric acid (6 M, 1 mL) was added to a solution of protected quinazoline **5** (44 mg, 0.08 mmol) in THF (1 mL, 0.1 M). The reaction mixture was stirred at 50 °C for 3 h and monitored by LCMS. Following completion of the reaction, the reaction mixture was concentrated *in vacuo* and purified by Biotage column chromatography on a KP-NH snap column eluting with 0-40% EtOH in CH2Cl2. Following column chromatography the material was triturated with Et2O to give **CCT366293** as a white solid (27 mg, 0.06 mmol, 81%). 1H NMR (500 MHz, DMSO-*d*6) 1.66 (qt, *J* = 12.2, 3.4 Hz, 2H), 1.74-1.80 (m, 2H), 2.07 (td, *J* = 11.6, 2.2 Hz, 2H), 2.52-2.60 (m, 3H), 2.67-2.73 (m, 2H), 3.06 (br d, *J* = 11.6 Hz, 2H), 7.22-7.26 (m, 2H), 7.30-7.35 (m, 2H), 7.61 (t, *J* = 8.0 Hz, 1H), 7.68 (s, 1H), 8.10 (dd, *J* = 8.0, 1.5 Hz, 1H), 8.16 (dd, *J* = 8.0, 1.5 Hz, 1H), 8.21 (s, 1H), 8.53 (s, 1H), 12.47 (br s, 1H); LCMS (Method A; ESI, *m/z*) *tr* = 1.27 min – 434 [(M+H)+-for 35Cl]; HRMS (Method B): found 434.1741; calculated for C24H25ClN5O (M+H)+ 434.1747.

1. Prepared according to Bavetsias, V. *et al*. *J Med Chem* **2016**, *59*, 1388-1409. [↑](#footnote-ref-1)
